# Supplementary material for: Relaxin deficiency results in increased expression of angiogenesis- and remodelling-related genes in the uterus of early pregnant mice but does not affect endometrial angiogenesis prior to implantation
Source: PubMed Central journal article supplement (PMC4802869; doi:10.1186/s12958-016-0148-y), 2016-03-22

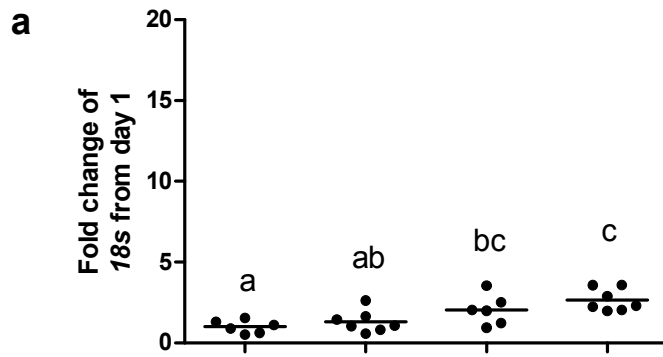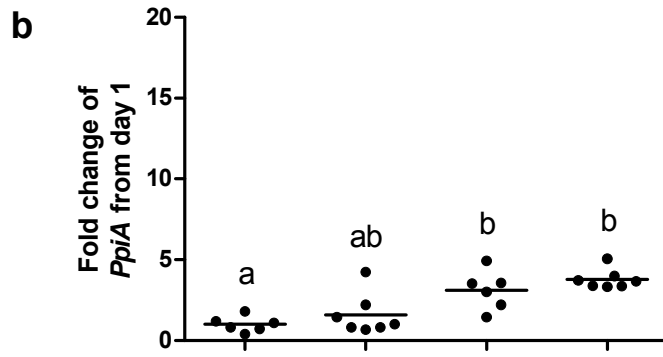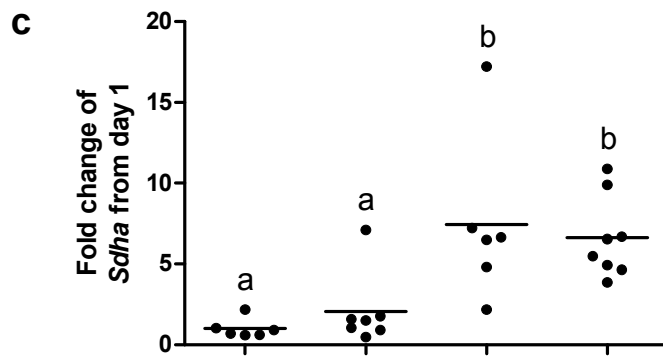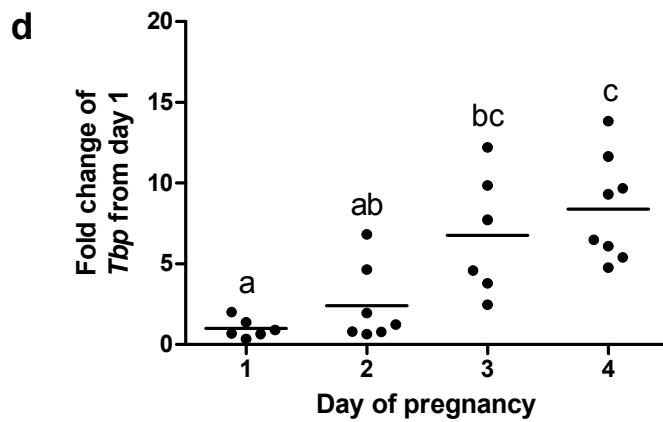

Supplement: 12958_2016_148_MOESM1_ESM.pdf [file 12958_2016_148_MOESM1_ESM.pdf]
